# Supplementary figures and images for: Interleukin 13 on Microglia is Neurotoxic in Lipopolysaccharide-injected Striatum in vivo
Source: PubMed Central journal article supplement — Exp Neurobiol. 2022 Feb 28;31(1):42–53. doi: 10.5607/en21032 (PMC8907255; doi:10.5607/en21032), 2022-02-28

Supplementary figure 1. Hong et al., 2021

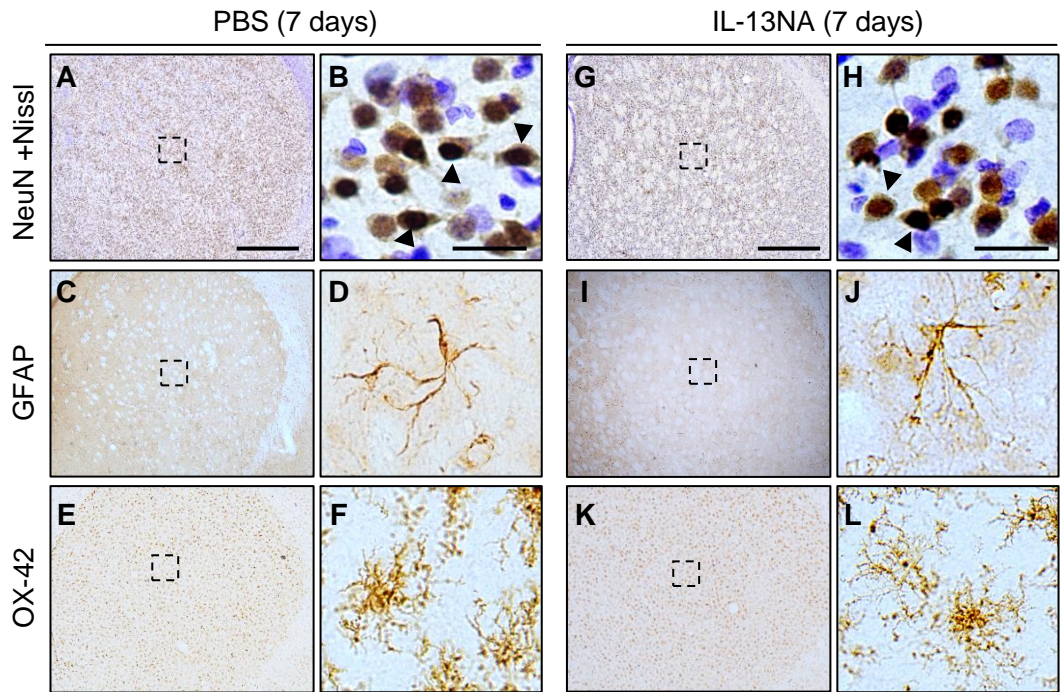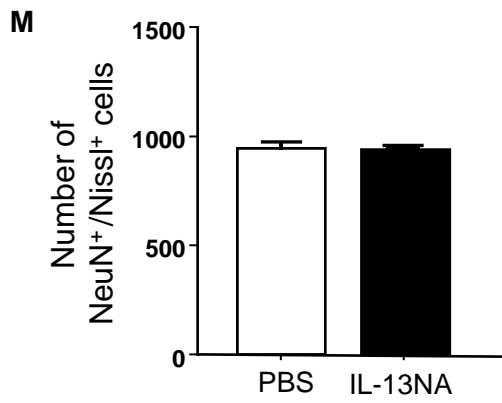

Supplement: en-31-1-42-supple1.pdf [file en-31-1-42-supple1.pdf]

Supplementary figure 2. Hong et al., 2021

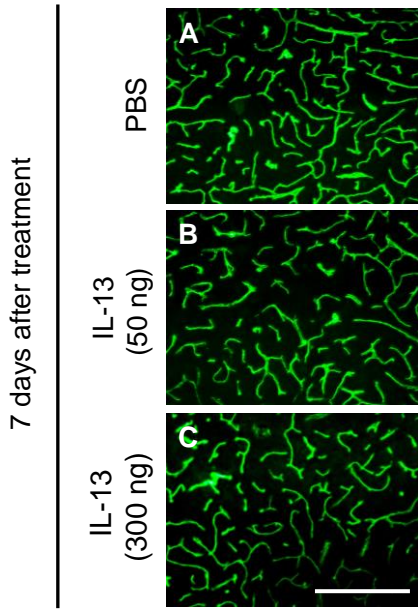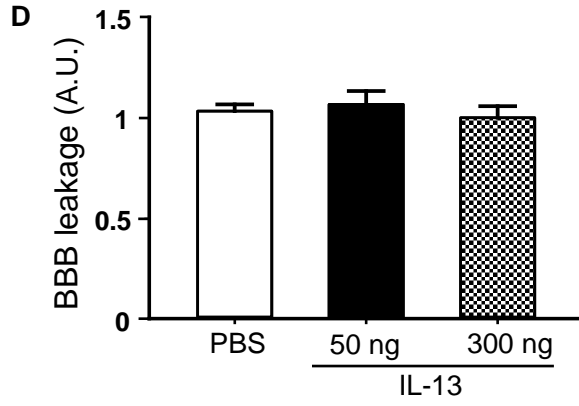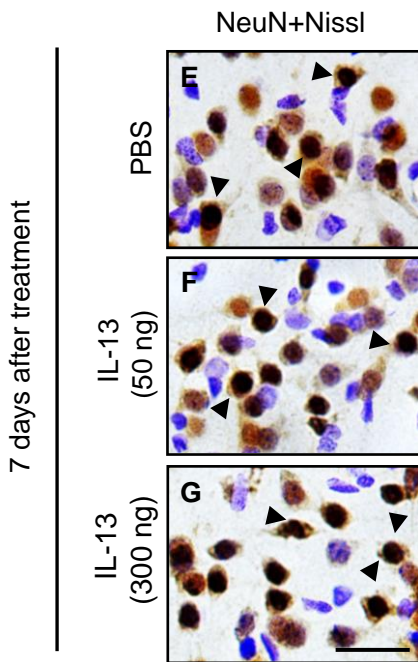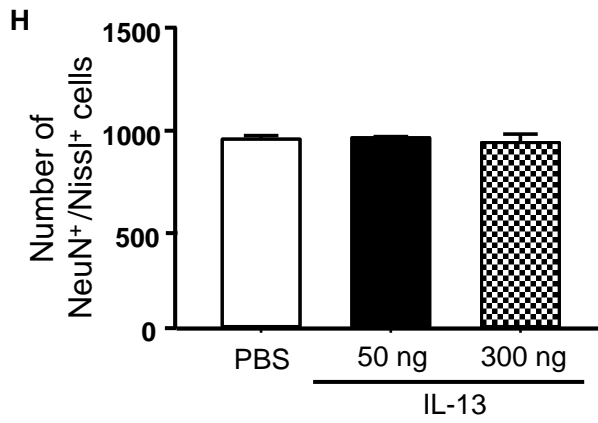

Supplement: en-31-1-42-supple2.pdf [file en-31-1-42-supple2.pdf]

Supplementary figure 3. Hong et al., 2021

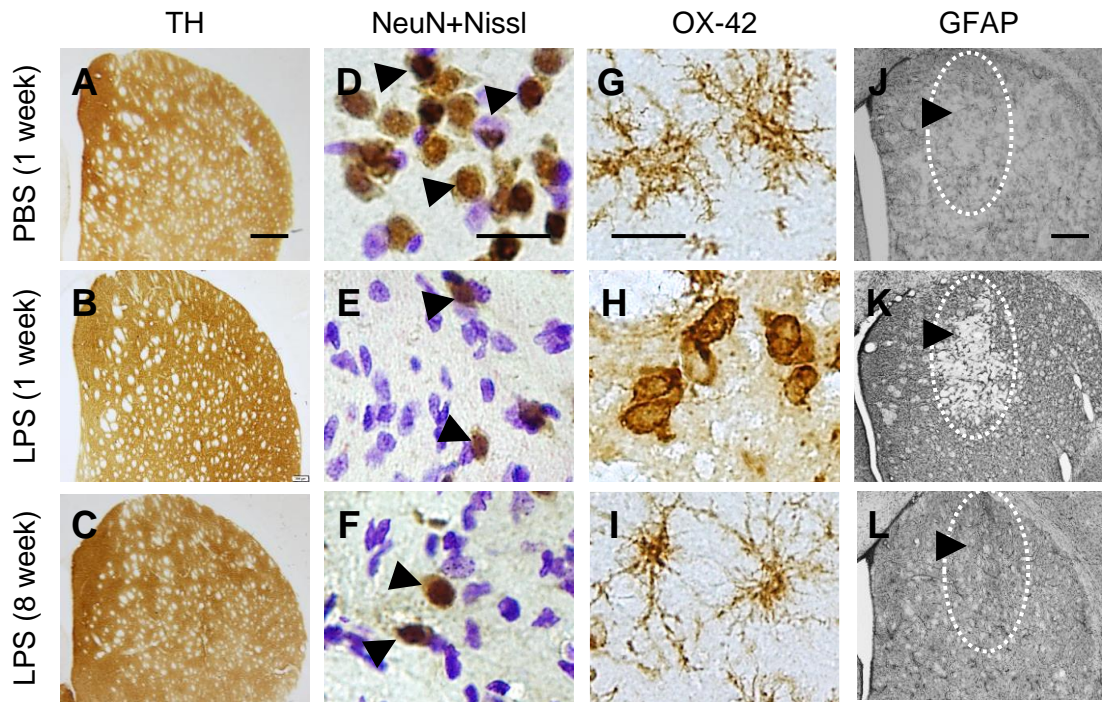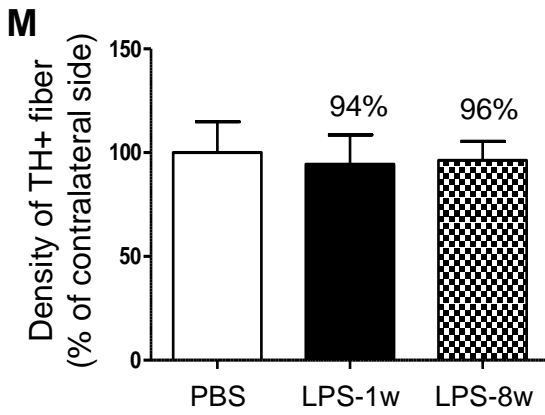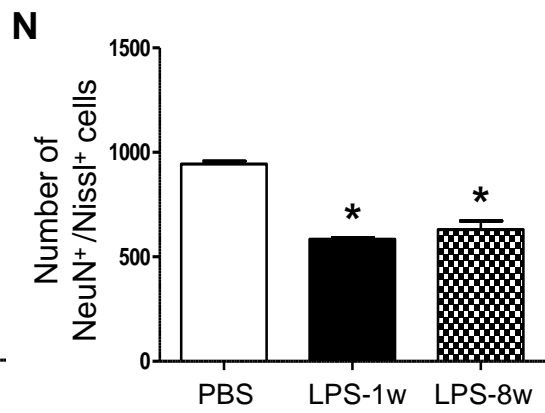

Supplement: en-31-1-42-supple3.pdf [file en-31-1-42-supple3.pdf]
